# Supplementary material
Source: PubMed Central journal article supplement (PMC4898314)
Supplement: supp_WNL.0000000000002739_Table_e-1.pdf [file supp_WNL.0000000000002739_Table_e-1.pdf]

Table e-1. EEG reports were available for 22 of the 87 children with perinatal arterial ischemic stroke.

Age of the patient (in days of life) at the time of the initial and follow-up EEG (when available) and

EEG results are provided.

| Age (days) | Initial EEG Results                                                                  | Age (days) | Follow-up EEG Results                                                                |
|------------|--------------------------------------------------------------------------------------|------------|--------------------------------------------------------------------------------------|
| 0          | Electrographic seizures, abnormal background, focal slowing, epileptiform discharges | 1          | Abnormal background, focal slowing, epileptiform discharges                          |
| 1          | Abnormal background, focal slowing, epileptiform discharges                          | none       |                                                                                      |
| 1          | Electrographic seizures, epileptiform discharges                                     | none       |                                                                                      |
| 1          | Electrographic seizures, abnormal background, focal slowing, epileptiform discharges | none       |                                                                                      |
| 1          | Electrographic seizures, abnormal background, epileptiform discharges                | 4          | Electrographic seizures, abnormal background, focal slowing, epileptiform discharges |
| 1          | Abnormal background, epileptiform discharges                                         | 9          | Epileptiform discharges                                                              |
| 2          | Abnormal background, focal slowing, epileptiform discharges                          | none       |                                                                                      |
| 2          | Electrographic seizures, abnormal background, epileptiform discharges                | none       |                                                                                      |
| 2          | Electrographic seizures, abnormal background, epileptiform discharges                | none       |                                                                                      |
| 2          | Normal                                                                               | 41         | Abnormal background                                                                  |
| 3          | Abnormal background                                                                  | none       |                                                                                      |

|      |                                                                                      |      |                                                  |
|------|--------------------------------------------------------------------------------------|------|--------------------------------------------------|
| 3    | Abnormal background, focal slowing, epileptiform discharges                          | none |                                                  |
| 3    | Abnormal background, focal slowing                                                   | 9    | Abnormal background                              |
| 4    | Normal                                                                               | none |                                                  |
| 4    | Electrographic seizures, abnormal background, epileptiform discharges                | none |                                                  |
| 5    | Normal                                                                               | none |                                                  |
| 6    | Normal                                                                               | none |                                                  |
| 14   | Electrographic seizures, abnormal background, epileptiform discharges                |      |                                                  |
| 188  | Epileptiform discharges                                                              | none | Electrographic seizures, epileptiform discharges |
| 213  | Normal                                                                               | 515  | Abnormal background, epileptiform discharges     |
| 293  | Abnormal background, focal slowing                                                   | none |                                                  |
| 1550 | Electrographic seizures, abnormal background, focal slowing, epileptiform discharges | none |                                                  |

---
