# Supplementary material
Source: PubMed Central journal article supplement (PMC4898314)
Supplement: supp_WNL.0000000000002739_Table_e-2.pdf [file supp_WNL.0000000000002739_Table_e-2.pdf]

Table e-2. Demographics and clinical characteristics of 87 neonates with arterial ischemic stroke, stratified by time of stroke presentation (during the neonatal period versus delayed presentation of presumed perinatal ischemic stroke).

|                                                      | <b>Neonatal<br/>presentation<br/>(N=48)<br/>n (%)</b> | <b>Delayed<br/>presentation<br/>(N=39)<br/>n (%)</b> | <b>P-<br/>value*</b> |
|------------------------------------------------------|-------------------------------------------------------|------------------------------------------------------|----------------------|
| <b>Demographics</b>                                  |                                                       |                                                      |                      |
| <b>Race/Ethnicity<sup>a</sup></b>                    |                                                       |                                                      | 0.2                  |
| <b>Non-Hispanic White</b>                            | 20 (42)                                               | 19 (49)                                              |                      |
| <b>Hispanic</b>                                      | 17 (35)                                               | 6 (15)                                               |                      |
| <b>Non-Hispanic Black</b>                            | 6 (13)                                                | 7 (18)                                               |                      |
| <b>Other</b>                                         | 5 (10)                                                | 7 (18)                                               |                      |
| <b>Male sex</b>                                      | 26 (54)                                               | 23 (59)                                              | 0.6                  |
| <b>Maternal/birth history</b>                        |                                                       |                                                      |                      |
| <b>Maternal age, median years (IQR)†</b>             | 29 (23-35)                                            | 29 (21-34)                                           | 0.8                  |
| <b>Gestational age, median weeks (range)†</b>        | 39 (30, 42)                                           | 39 (27, 41)                                          | 0.9                  |
| <b>Primiparity</b>                                   | 25 (52)                                               | 26 (67)                                              | 0.2                  |
| <b>Pre-eclampsia</b>                                 | 4 (8)                                                 | 6 (15)                                               | 0.3                  |
| <b>Chorioamnionitis</b>                              | 13 (27)                                               | 4 (10)                                               | 0.05                 |
| <b>Prolonged rupture of membranes (&gt;24 hours)</b> | 4 (10)                                                | 6 (13)                                               | 0.7                  |
| <b>Prolonged second stage of labor (&gt;2 hours)</b> | 4 (8)                                                 | 6 (15)                                               | 0.3                  |
| <b>Emergent Cesarean Section</b>                     | 16 (33)                                               | 12 (31)                                              | 0.8                  |
| <b>Operative vaginal delivery</b>                    | 11 (23)                                               | 8 (21)                                               | 0.8                  |
| <b>Birth weight, median kilograms (SD)§</b>          | 3.3 (0.6)                                             | 3.0 (0.7)                                            | 0.1                  |

|                                                        |             |               |        |
|--------------------------------------------------------|-------------|---------------|--------|
| <b>Neonatal HIE</b>                                    | 5 (10)      | 1 (3)         | 0.2    |
| <b>5 minute Apgar<sup>a</sup></b>                      |             |               | 0.1    |
| <b>&gt;6</b>                                           | 39 (81)     | 36 (95)       |        |
| <b>4-6</b>                                             | 7 (15)      | 1 (3)         |        |
| <b>0-3</b>                                             | 2 (4)       | 1 (3)         |        |
| <b>Stroke characteristics</b>                          |             |               |        |
| <b>ACA infarct</b>                                     | 1 (2)       | 0 (0)         | 0.4    |
| <b>MCA infarct</b>                                     | 30 (63)     | 25 (64)       | 0.9    |
| <b>PCA infarct</b>                                     | 5 (10)      | 1 (3)         | 0.2    |
| <b>Small vessel stroke</b>                             | 2 (5)       | 1 (3)         | 0.7    |
| <b>Multiple infarcts</b>                               | 14 (29)     | 1 (3)         | 0.001* |
| <b>Prothrombotic disorder</b> (∞, N=41)                | 4/23 (17)   | 2/18 (11)     | 0.6    |
| <b>Cardiac disease</b>                                 | 2 (4)       | 0 (0)         | 0.2    |
| <b>Median months of age at walking (IQR) (∞, N=64)</b> | 13 (10-17)  | 16 (13-22)    | 0.04*  |
| <b>Cerebral palsy diagnosis during follow-up</b>       | 21 (50)     | 33 (85)       | 0.001* |
| <b>Median years of follow-up (IQR)†</b>                | 5 (2.6, 10) | 7.7 (5.1, 11) | 0.3    |

\*P-value ≤ 0.05; <sup>a</sup>P-value for difference between categories; †K-sample test for equality of median; §t-test; ∞Among subset with data available (N=41); Abbreviations: IQR= interquartile range, SD = standard deviation, ACA = anterior cerebral artery, MCA = middle cerebral artery, PCA = posterior cerebral artery
